# Supplementary material for: Investigation of the Microenvironment, Land Cover Characteristics, and Social Vulnerability of Heat-Vulnerable Bus Stops in Knoxville, Tennessee
Source: Preprints.org preprint supplement (doi:10.20944/preprints202306.0778.v1), 2023-06-12
Supplement: Supplementary file 1 [file supplementary]

**Table S1**. SVI in the area and adjacent areas where the highest temperature bus stops are located

: Percentage score higher than the average score for Knox County

| Time | : |  |  |  | Morning Evening | Morning, Afternoon Evening | Morning | Afternoon | Afternoon | Afternoon | Afternoon | Afternoon | Afternoon | Evening | Evening | Evening | Evening | Evening |
| --- | --- | --- | --- | --- | --- | --- | --- | --- | --- | --- | --- | --- | --- | --- | --- | --- | --- | --- |
| Cardinal points |  |  |  |  | W | W | W | NE | NE | SW | NW | S | NW | NW | NE | N | C (Univ. of TN) | C (Univ. of TN) |
| Bus stop  ID |  |  |  |  | 1595  1596  1599  1506 | 2625  1510  1027  1020  1229  1509  1592 | 1545 | 1347 | 1908  1314 | 1484 | 1554 | 2197  2630  2164 | 2358 | 1816  1817 | 2235  1098 | 1248 | 1787 | 2644 |
| GEOID  (FIBS) |  |  |  |  | 4404 | 4403 | 5706 | 1500 | 1700 | 7100 | 2700 | 6800 | 4615 | 7000 | 6700 | 3902 | 6902 | 902 |
| Neighbor  (FIBS) |  |  |  |  | 4403 | 4404 | 5704 |  | 1600  6600 | 3700 | 2800 | 6700 | 4501 |  |  | 4800 | 6901  6903 | 6901 |
| SVI |  | Avg. of the U. S | Avg. of TN | Avg. of Knox County |  |  |  |  |  |  |  |  |  |  |  |  |  |  |
| % Below poverty | 15.2 | 25.8 | 24.1 | 16.9 | 16.9 | 12.6 | 30.3 | 34.2 | 20.1 | 50.4 | 57.4 | 32.6 | 68.7 | 49.2 | 40.8 | 77.0 | 83.2 |
| % Unemployed | 6.3 | 1.1 | 4.4 | 0.4 | 0.4 | 2.9 | 5 | 5.9 | 1.3 | 6.6 | 8.2 | 4.6 | 12.7 | 10.1 | 4.1 | 6.2 | 4.5 |
| % No high school diploma | 13 | 8.3 | 8.4 | 3.8 | 3.8 | 1.8 | 6.7 | 15.6 | 7.8 | 21.6 | 18.3 | 10.2 | 8.9 | 13.8 | 15.5 | 2.6 | 9.8 |
| % Aged 65 or older | 16 | 13.3 | 15.5 | 17.6 | 17.6 | 17.9 | 10.9 | 19.4 | 17.1 | 12.3 | 11.2 | 12.6 | 8.4 | 9.8 | 14.8 | 0.5 | 0.9 |
| % Aged 17 or younger | 22.1 | 21.5 | 20.6 | 18.3 | 18.3 | 18.5 | 15.9 | 15.3 | 19.3 | 28.3 | 19.4 | 20.0 | 23.4 | 18.9 | 28.0 | 1.0 | 0.4 |
| % Civilian with a disability | 13.3 | 11.4 | 12.2 | 12.1 | 12.1 | 9.0 | 13.3 | 18.8 | 13.6 | 16.3 | 17.1 | 8.9 | 16.3 | 18.4 | 19.6 | 3.0 | 2.8 |
| % Single-parent households | 9.2 | 7 | 6.3 | 4.3 | 4.3 | 2.4 | 7.4 | 1.5 | 2.4 | 2.4 | 2.4 | 2.4 | 22.9 | 12.6 | 2.4 | 5.9 | 2.4 |
| % Speaks English "less than well" | 4.2 | 1.4 | 1.2 | 0.3 | 0.3 | 1.4 | 0.3 | 1.7 | 0.9 | 3.9 | 2.6 | 3.9 | 1.2 | 0.5 | 3.6 | 0.0 | 0.0 |
| % Minority | 38.3 | 27.1 | 19.2 | 15.0 | 15.0 | 21.1 | 26.5 | 18.0 | 10.0 | 37.0 | 58.7 | 25.8 | 58.1 | 57.4 | 30.9 | 18.9 | 11.4 |
| % Households with no vehicle | 9.4 | 0.2 | 5.9 | 7.9 | 7.9 | 5.3 | 6.4 | 16.3 | 10.0 | 8.3 | 39.6 | 6.4 | 27.7 | 29.9 | 2.2 | 3.9 | 27.2 |
| % Group quarters | - | 2.6 | 3 | 2.8 | 2.8 | 0.0 | 5.7 | 7.0 | 0.0 | 0.3 | 1.8 | 2.2 | 1.9 | 2.8 | 0.0 | 15.1 | 43.5 |
| % Black/African American | - | 13.9 | 9.7 | 3.2 | 3.2 | 3.8 | 11.5 | 11.0 | 1.7 | 20.6 | 53.8 | 8.5 | 41.5 | 52.3 | 15.9 | 7.7 | 5.9 |
| % Hispanic or Latino | - | 1.7 | 4.3 | 3.2 | 3.2 | 5.4 | 6.8 | 4.2 | 5.35 | 11.9 | 2.3 | 9.2 | 2.2 | 3.3 | 10.1 | 3.1 | 2.3 |

**Table S2.** SVI in the area and adjacent areas where the highest temperature bus stops are located

: Percentage score higher than the average score for Knox County

| Time |  |  |  |  | Morning, Evening | Morning, Afternoon, Evening | Morning, Afternoon | Afternoon | Afternoon | Afternoon |
| --- | --- | --- | --- | --- | --- | --- | --- | --- | --- | --- |
| Cardinal points |  |  |  |  | N  (Fountain City,  Harrill Hills) | N  (Fountain City) | N (Harrill Hills) | S (Lake Forest) | S (Island Home) | S (Lake Forest, Wiidfiekd Park,  Bonny Kate) |
| Bus stop  ID |  |  |  |  | 1913 1324 | 2055, 2057, 2058, 2475,  1920, 1922, 1921, 1324 | 1323 | 1137  1134  1413 | 1460 | 1701  2682 |
| GEOID  (FIBS) |  |  |  |  | 4200 | 4100 | 4300 | 3400 | 2200 | 5603 |
| Neighbor  (FIBS) |  |  |  |  | 5000 |  | 4200 | 2300 |  | 5501 |
| SVI |  | Avg. of the U. S | Avg. of TN | Avg. of Knox  County |  |  |  |  |  |  |
| % Below poverty | 15.2 | 25.8 | 24.1 | 24.2 | 19.3 | 21.6 | 23.8 | 26.7 | 13.1 |
| % Unemployed | 6.3 | 1.1 | 4.4 | 8.7 | 5.8 | 4.5 | 3.0 | 4.3 | 2.7 |
| % No high school diploma | 13 | 8.3 | 8.4 | 5.8 | 10.9 | 7.3 | 7.6 | 8.7 | 10.7 |
| % Aged 65 or older | 16 | 13.3 | 15.5 | 14.4 | 13.4 | 14.7 | 15.8 | 12.4 | 22.2 |
| % Aged 17 or younger | 22.1 | 21.5 | 20.6 | 17.8 | 13.6 | 18.0 | 16.1 | 29 | 17.7 |
| % Civilian with a disability | 13.3 | 11.4 | 12.2 | 16.8 | 14.4 | 15.8 | 14.1 | 15.9 | 13.6 |
| % Single-parent households | 9.2 | 7 | 6.3 | 6.7 | 4.7 | 6.3 | 5.6 | 3.8 | 4.4 |
| % Speaks English  "less than well" | 4.2 | 1.4 | 1.2 | 0.2 | 1.4 | 0.2 | 0.1 | 0.3 | 0.0 |
| % Minority | 38.3 | 27.1 | 19.2 | 10.0 | 20.3 | 13.6 | 16.8 | 10 | 10.3 |
| % Households with no vehicle | 9.4 | 0.2 | 5.9 | 4.5 | 4.9 | 3.6 | 5.5 | 5.1 | 0.6 |
| % Group quarters | - | 2.6 | 3 | 0.7 | 0.5 | 0.5 | 0.0 | 0 | 0.0 |
| % Black/African  American | - | 13.9 | 9.7 | 6.3 | 11.6 | 9.7 | 6.8 | 3.8 | 3.1 |
| % Hispanic or Latino | - | 1.7 | 4.3 | 2.5 | 3.8 | 2.1 | 5.0 | 2.4 | 3.1 |
